# Supplementary material for: Novel insights into iron metabolism by integrating deletome and transcriptome analysis in an iron deficiency model of the yeast Saccharomyces cerevisiae
Source: Springer Nature journal article supplement (doi:10.1186/1471-2164-10-130), 2009-03-25

**Yeast Iron Map.** Jo, Kim, Oh *et al.* (2009). Novel insights into iron metabolism by integrating deletome and transcriptome analysis in an iron deficiency model of the yeast *Saccharomyces cerevisiae*

Go to map 

**Cellular Component (click to view on map)**

|                                                   |                 |
|---------------------------------------------------|-----------------|
| Cell wall                                         | Mitochondrion 3 |
| Cellular bud                                      | Nucleolus       |
| Cytoplasm                                         | Nucleus         |
| Endoplasmic Reticulum                             | Other           |
| Endosome                                          | Peroxisome      |
| Endosome and cytoplasmic membrane-bounded vesicle | Plasma membrane |
| Golgi apparatus                                   | Ribosome        |
| Membrane                                          | Unknown         |
| Mitochondrion 1                                   | Vacuole 1       |
| Mitochondrion 2                                   | Vacuole 2       |

**Pathway (click to view on map)**

|                                                           |                                             |
|-----------------------------------------------------------|---------------------------------------------|
| Biotine biosynthesis                                      | Glycolytic pathways                         |
| <i>De novo</i> biosynthesis of purine nucleotides         | Heme biosynthesis                           |
| <i>De novo</i> biosynthesis of pyrimidine ribonucleotides | Histidine biosynthesis                      |
| Electron transport chain                                  | Leucine, isoleucine and valine biosynthesis |
| Ergosterol pathway                                        | Lysine biosynthesis                         |
| Galactose metabolism                                      | Sulfur amino acid biosynthesis              |
| Glutamate biosynthesis                                    | TCA cycle                                   |

**Legend**

|                                                            |                                                                                     |                                                                                    |                                                                                       |
|------------------------------------------------------------|-------------------------------------------------------------------------------------|------------------------------------------------------------------------------------|---------------------------------------------------------------------------------------|
| Functional data - gene deletion induces sensitivity to BPS |  | Expression data - gene is up regulated in BPS                                      |  |
| Functional data - gene deletion induces resistance to BPS  |  | Expression data - gene is down regulated in BPS                                    |  |
| Physical interaction (PI)                                  |  | Transcriptional regulation expected (TRE)                                          |  |
| Metal transport (MT/PMT)                                   |  | Indirect regulation expected (IRE)                                                 |  |
| Metal transfer expected (MTE)                              |  | Pathway sequence / step (PS)                                                       |  |
| Transcriptional down regulation (TRD)                      |  | Unknown pathway sequence / step (UPS)                                              |  |
| Indirect transcriptional down regulation (ITRD)            |  | Regulatory stimulus (REG)                                                          |  |
| Transcriptional up regulation (TRU)                        |  | Involved in FeS cluster assembly (FeS)                                             |  |
| Indirect transcriptional up regulation (ITRU)              |  | Translational activator (TLA)                                                      |  |
| Transcriptional regulation (TR)                            |  | Activation by phosphorylation (AP)                                                 |  |
|                                                            |                                                                                     | Genes within respiratory chain complex, or involved in maturation or assembly (RC) |  |

Novel insights into iron metabolism by integrating deletome and transcriptome analysis in an iron deficiency model of the yeast *Saccharomyces cerevisiae*  
Jo, Kim, Oh, et al. (2009)

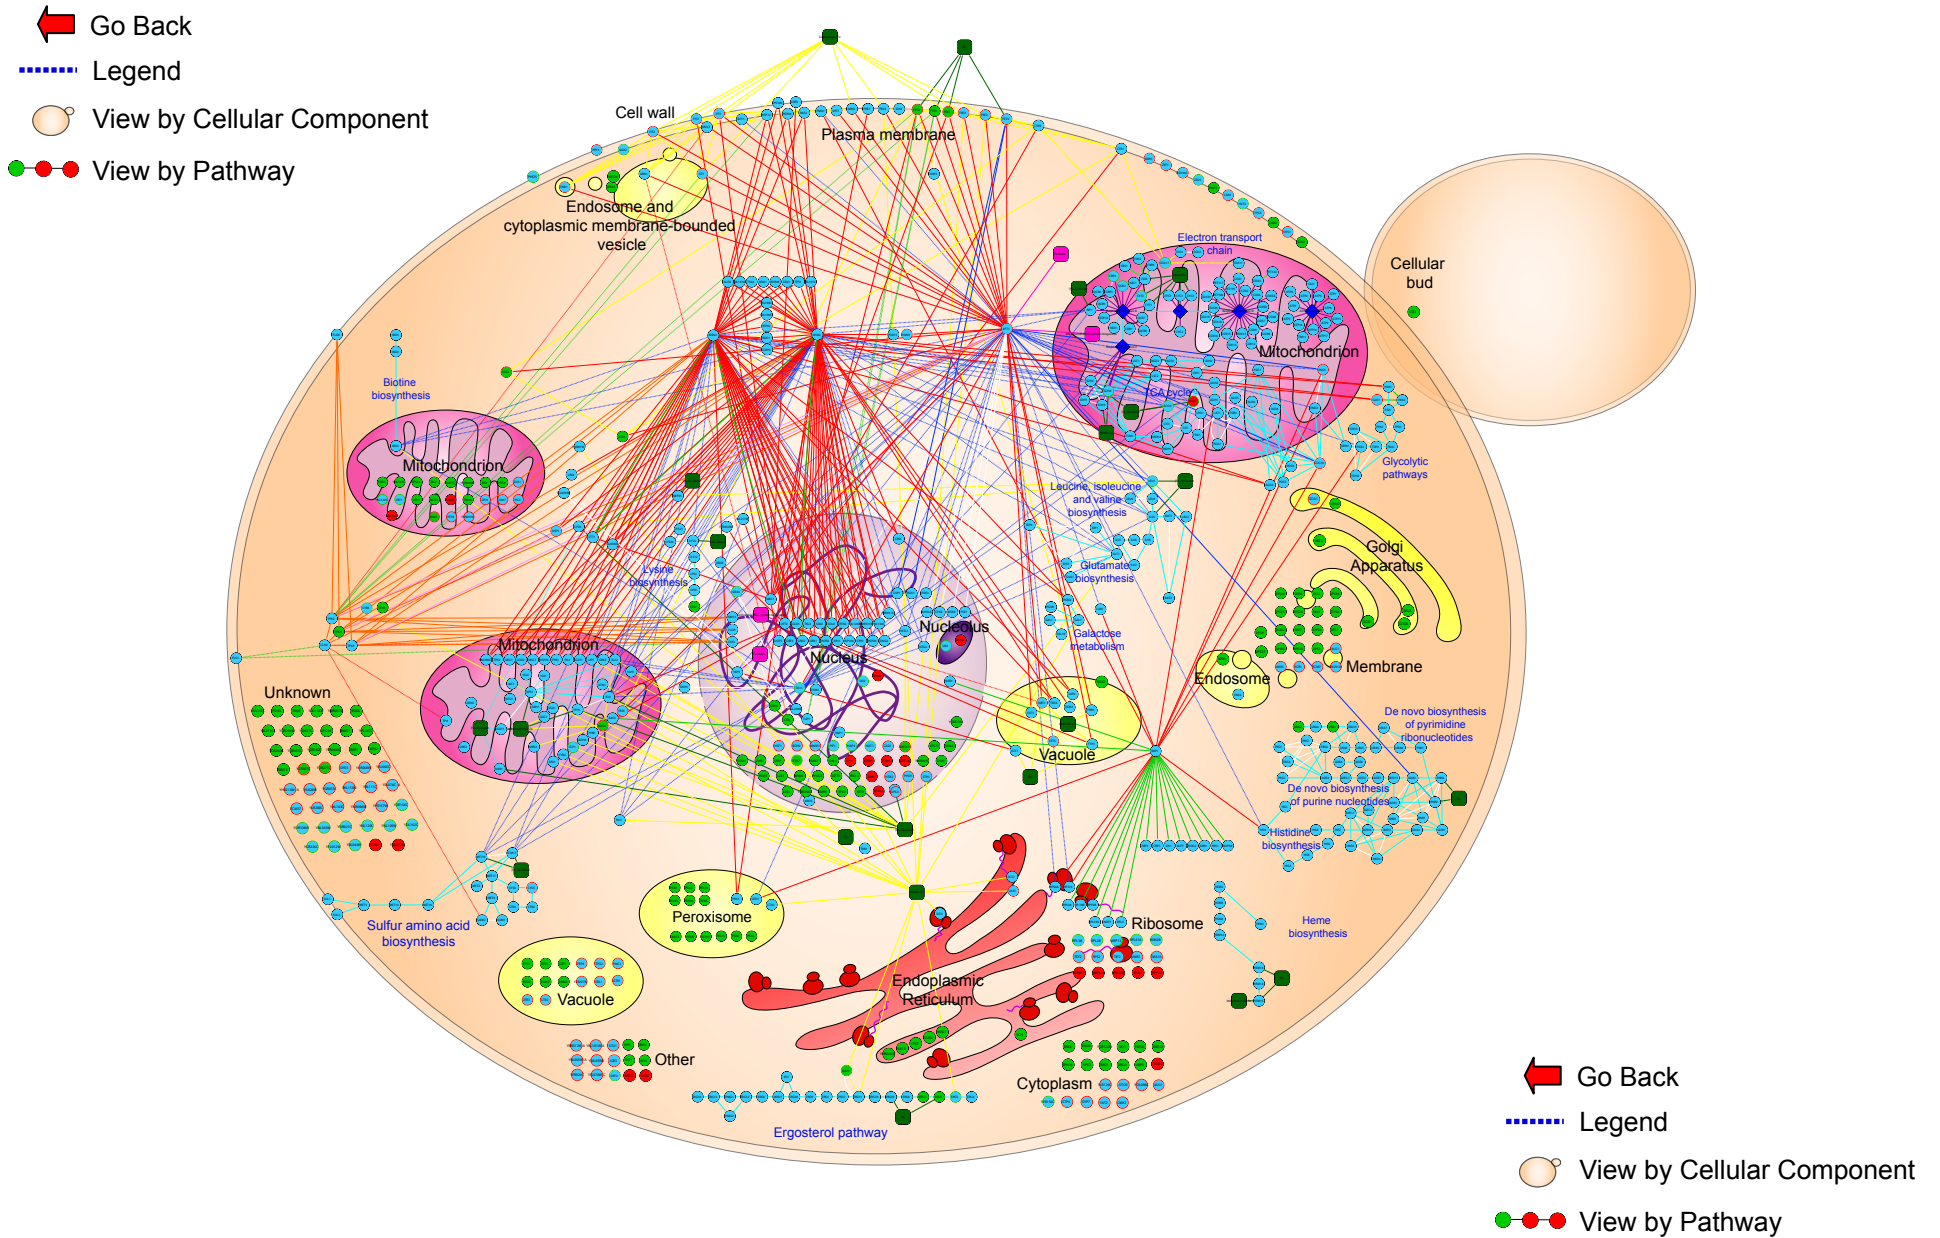

Supplement: Additional file 16 [file 1471-2164-10-130-s16.pdf]
